# Supplementary figures and images for: Altered regulation of cardiac ankyrin repeat protein in heart failure
Source: PubMed Central journal article supplement — Heliyon. 2018 Feb 1;4(1):e00514. doi: 10.1016/j.heliyon.2018.e00514 (PMC5857524; doi:10.1016/j.heliyon.2018.e00514), 2018-02-01

Beta II Spectrin

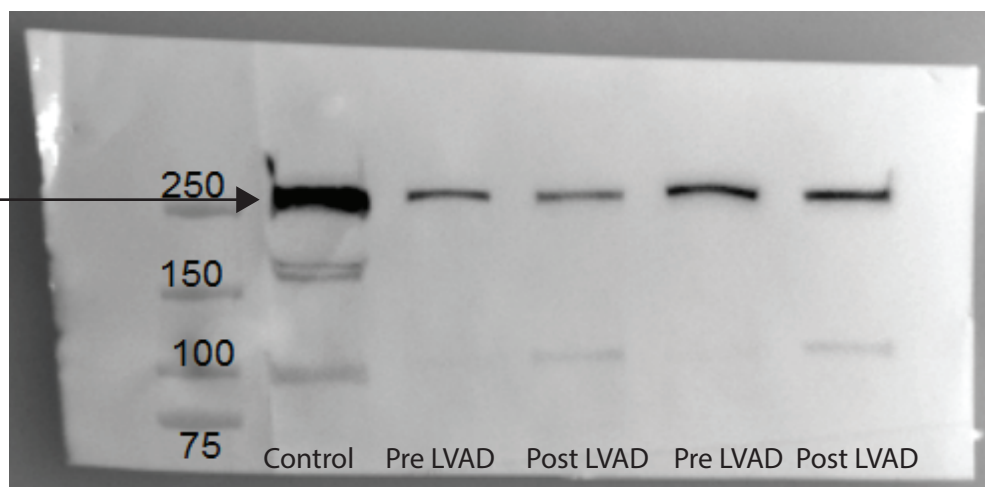

GAPDH

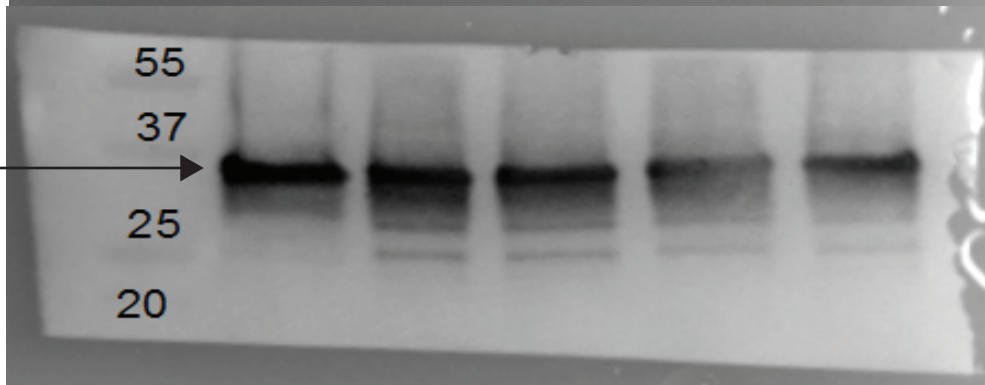

Supplement: mmc1.pdf [file mmc1.pdf]

Input    IgG     $\beta$ II Spectrin Ig    Flow Thru

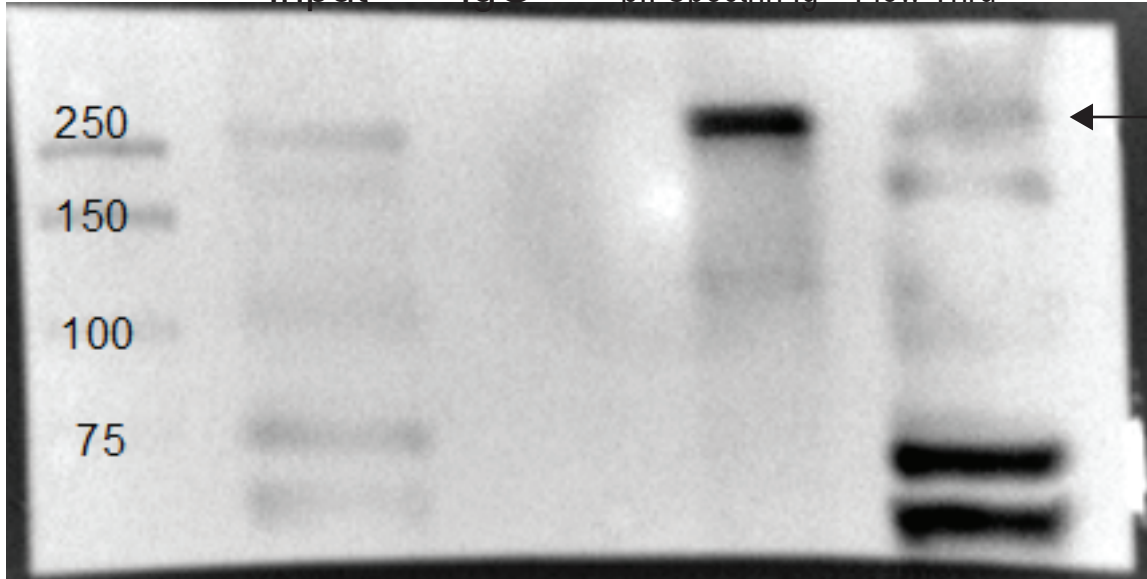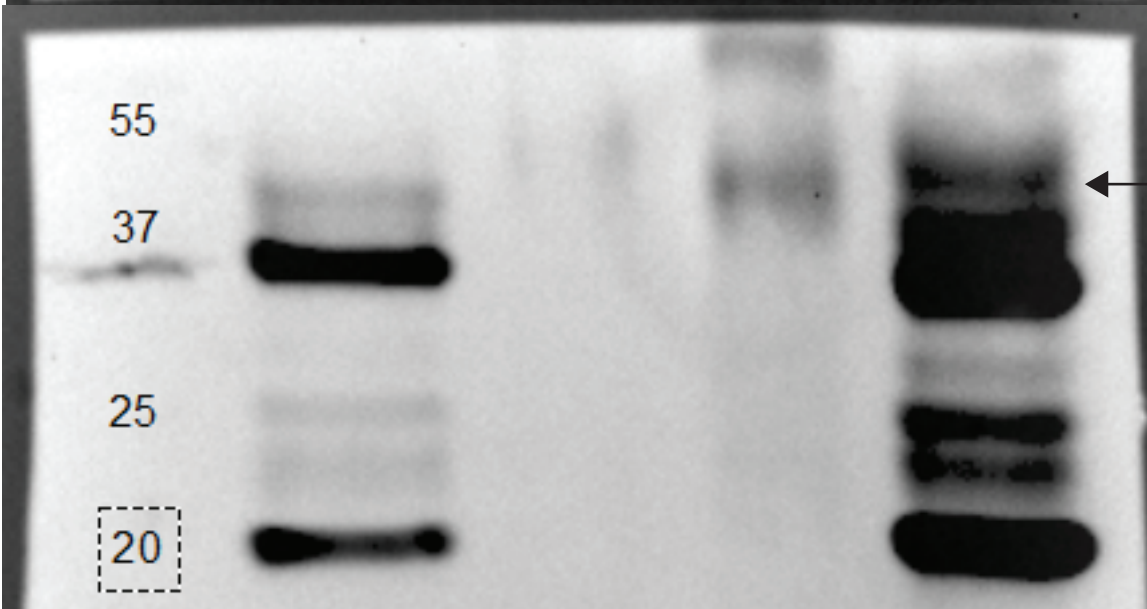

Supplement: mmc2.pdf [file mmc2.pdf]

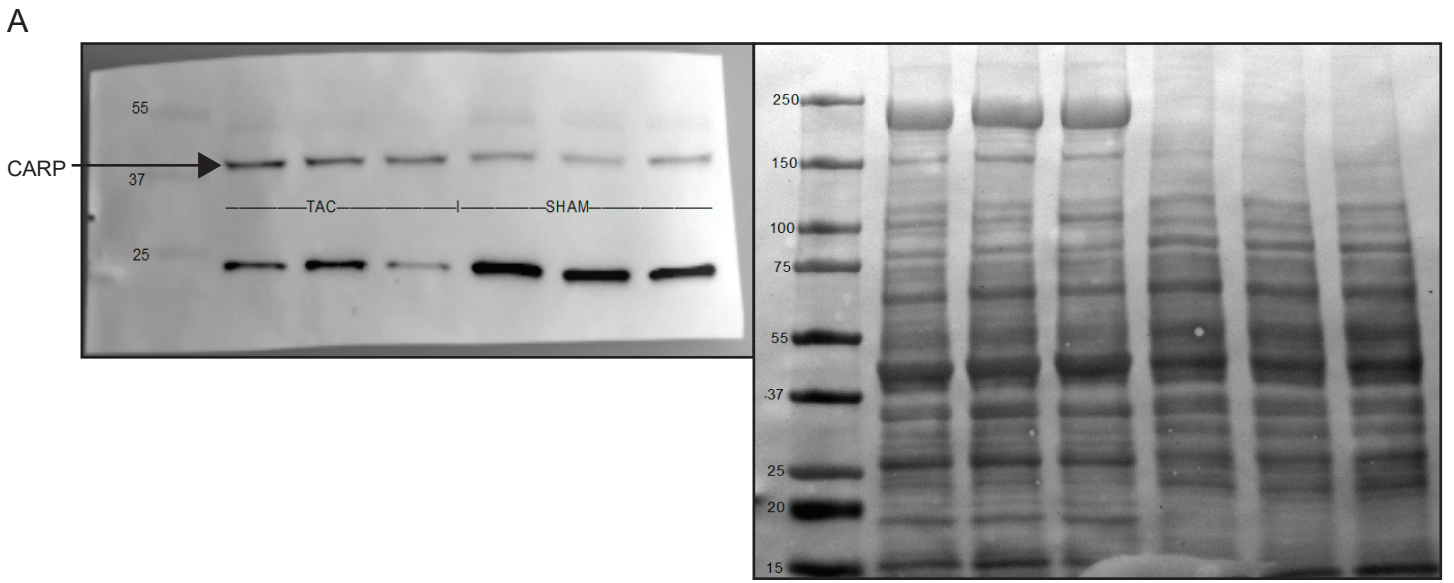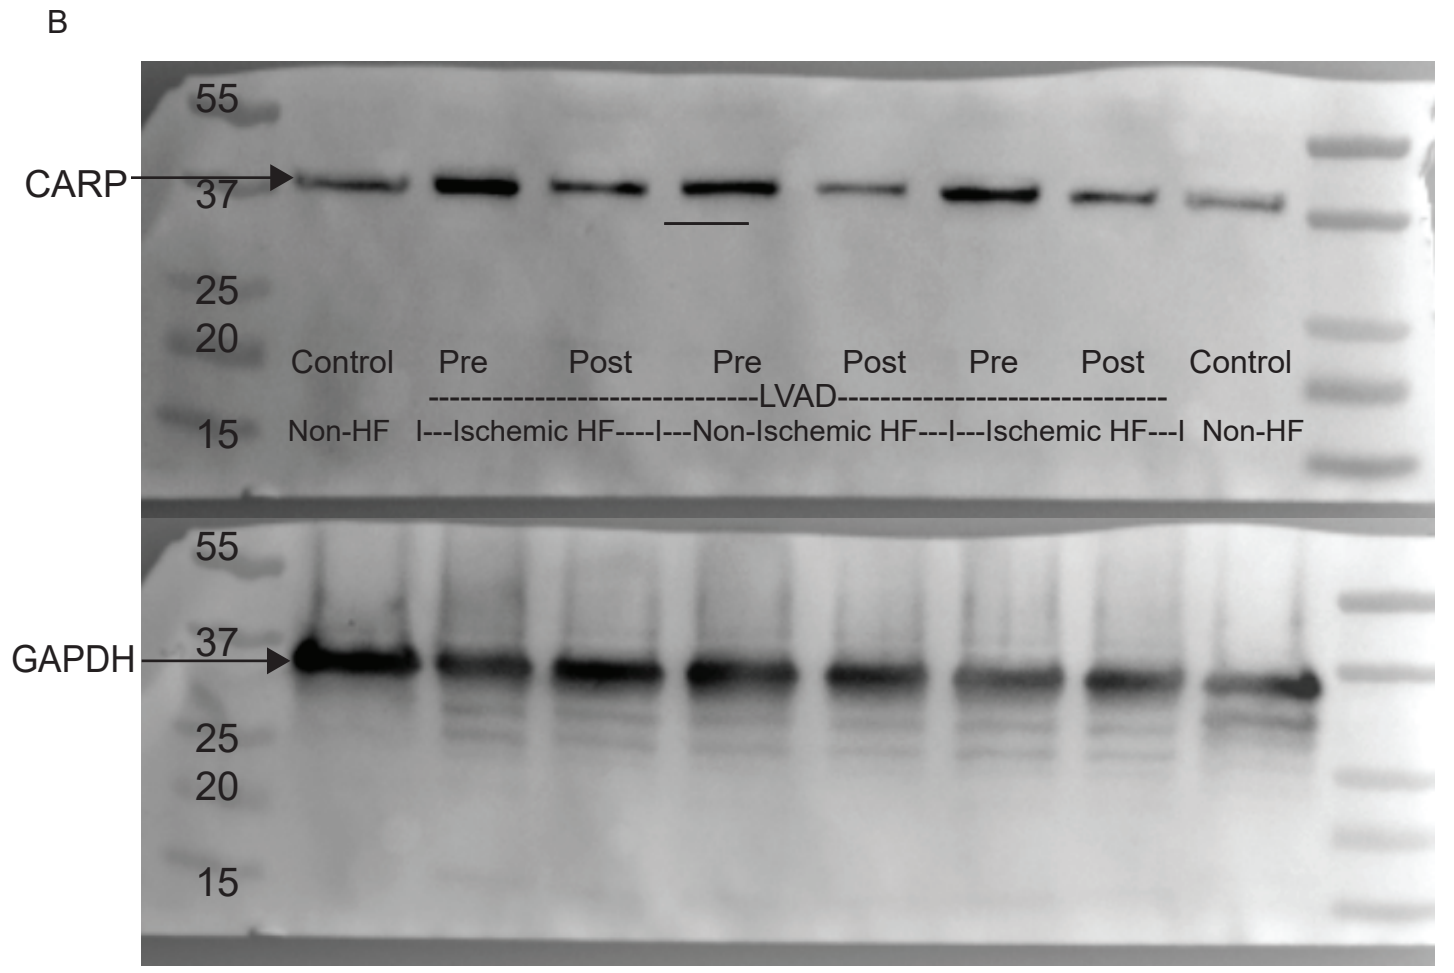

Supplement: mmc3.pdf [file mmc3.pdf]

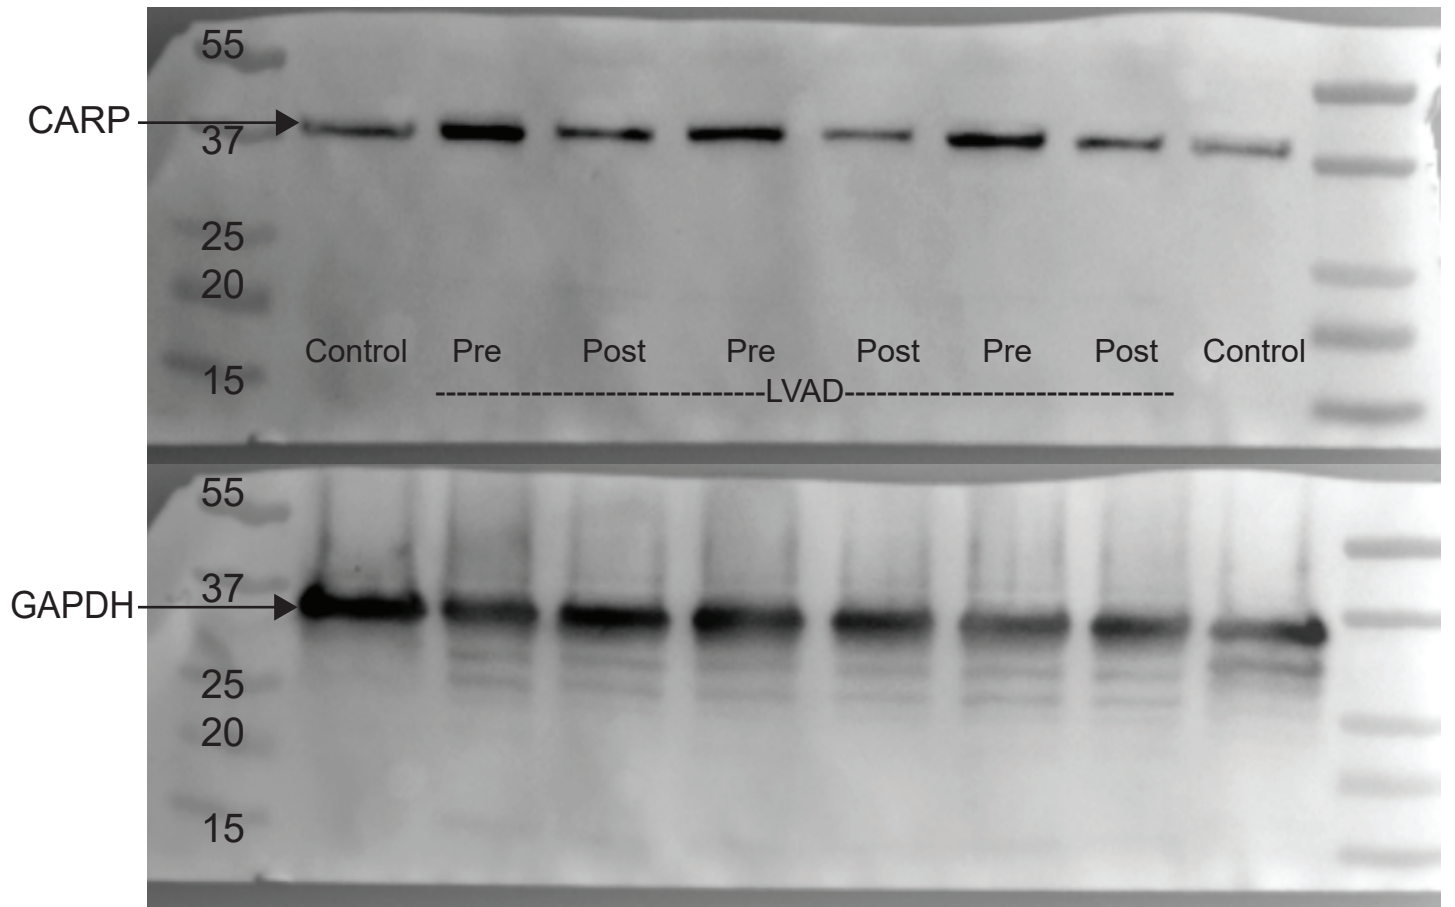

Supplement: mmc4.pdf [file mmc4.pdf]
